# Supplementary material
Source: publisher site journal article supplement (https://cdn.bio-protocol.org/journal/static/2405329_Supplementary%20information.docx)
Supplement: Supplementary file 1 [file 2405329_Supplementary%20information.docx]

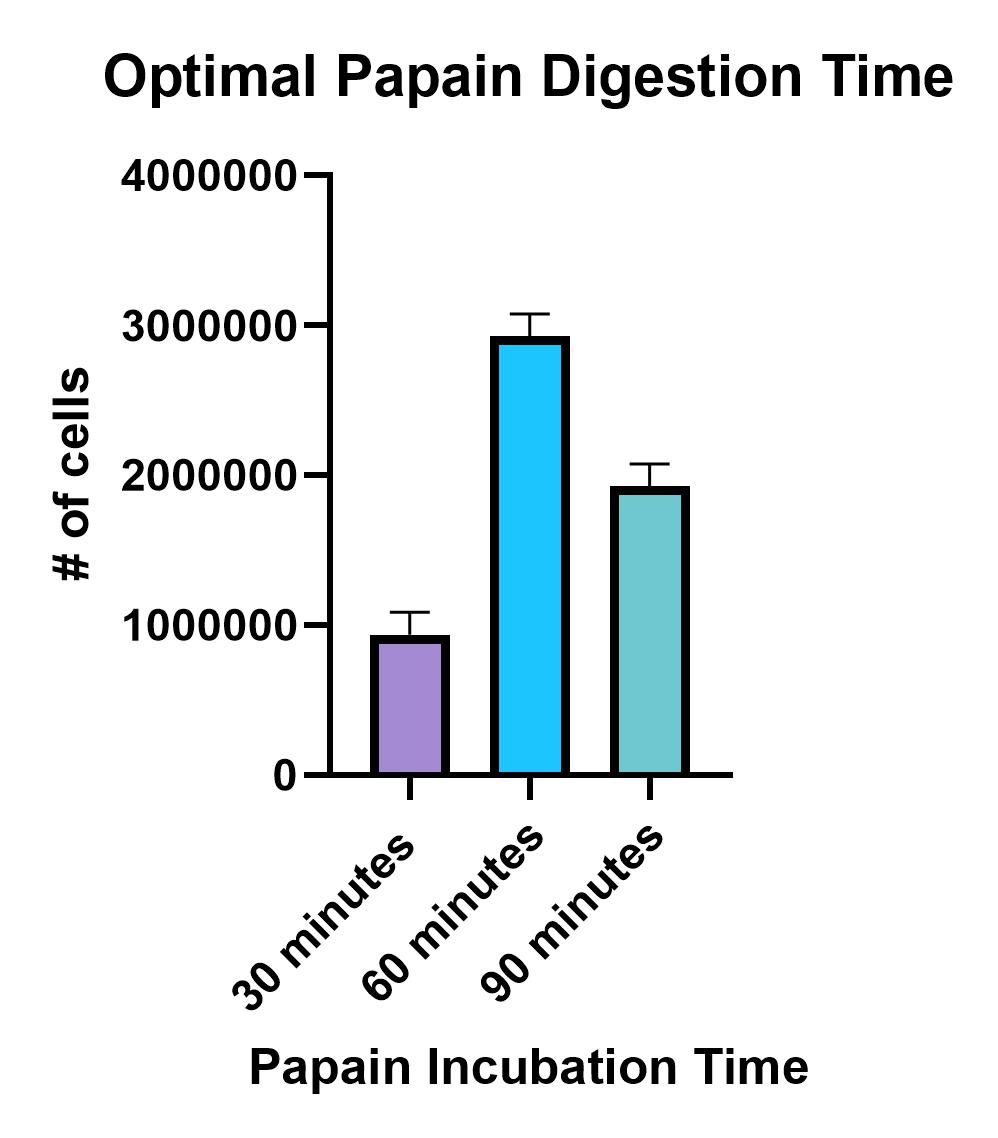


**Figure S1. 60 minutes is the optimal time for retinae papain digestion.** Retinae from adult (3–6 months) mice were extracted and digested in papain for either 30, 60, or 90 minutes. Trypan blue staining was carried out to determine the amount of live/dead cells at each time point after the papain digestion was completed. A 60-minute papain digestion yielded the highest amount of living cells. Total retinae: *n = 24.* Results are from three separate experiments with two replicates each.


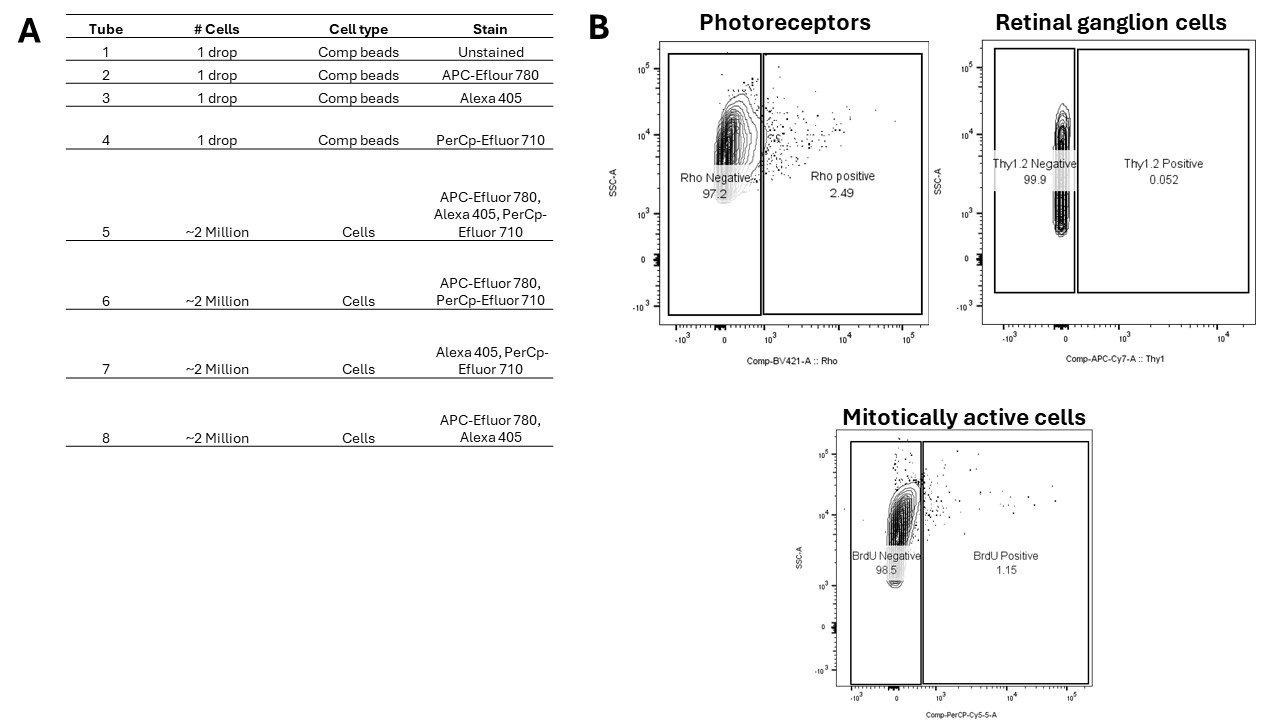


**Figure S2. Fluorescence minus one (FMO) for photoreceptors, retinal ganglion cells, and mitotically active cells. (A)** Panel used for this experiment: APC- Efluor-780 FMO- cells with all stains except APC- Efluor-780, Alexa-405 FMO- cells with all stains except Alexa-405, PerCP-EFluor-710 FMO- cells with all stains except PerCP-EFluor-710, and cells containing every fluorophore. **(B)** Gates are made to set positive and negative populations.


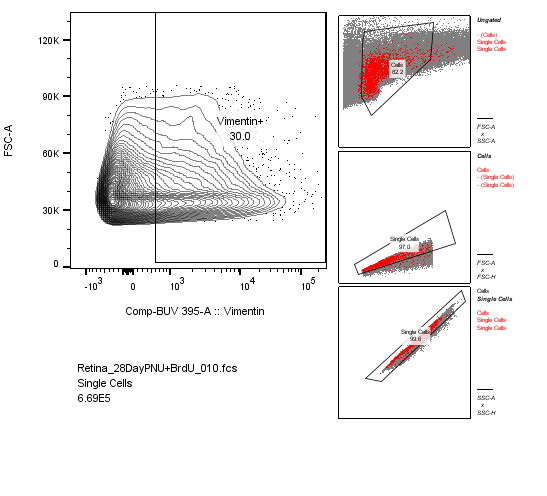


**Figure S3. Backgating for vimentin+ Müller glia.** Backgating is a useful tool provided by FlowJo Software to ensure users are not unintentionally excluding populations of interest with gates. In this demonstration, Vimentin+ Müller glia cells are shown in red.
